# Supplementary material for: Effect of Fibrin Concentration on the In Vitro Production of Dermo-Epidermal Equivalents
Source: MDPI journal article supplement (doi:10.3390/ijms22136746), 2021-06-23
Supplement: s1 [file s1]

## Supplementary

### 1. Turbidimetry study

These absorption spectrometry results showed that, in the range between 325 nm to 500 nm, both human plasma at 1.2mg/ml (Figure S1-A) and at 2.4 mg/ml (FigureS1- B) present important absorption differences between their sol and gel states. In view of these results, a wavelength of 325 nm was selected to follow by turbidimetry the gelation dynamics experiments of Figure 1B.

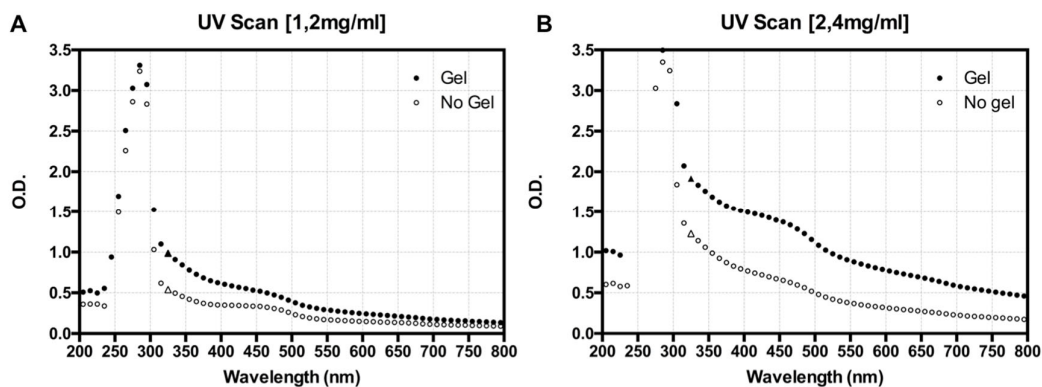

**Figure S1.** UV scan from 200 nm to 800 nm of (A) human plasma at 1.2mg/ml (A) and at 2.4 mg/ml (B) of fibrinogen concentration before (empty circles) and after (filled circles) polymerization.
